1 Third generation sequencing revises the molecular karyotype for *Toxoplasma gondii* and identifies  
2 emerging copy number variants in sexual recombinants.

3

4 Jing Xia<sup>1</sup>, Aarthi Venkat<sup>2,3</sup>, Karine Le Roch<sup>4</sup>, Ferhat Ay<sup>3,5</sup> and Jon P. Boyle<sup>1\*</sup>

5

6

7 <sup>1</sup>Department of Biological Sciences, Dietrich School of Arts and Sciences, University of  
8 Pittsburgh

9 <sup>2</sup>Computational Biology and Bioinformatics, Yale University, New Haven, CT, 06520.

10 <sup>3</sup>La Jolla Institute for Immunology, La Jolla, CA, 92037.

11 <sup>4</sup>Department of Molecular, Cell and Systems Biology, College of Agricultural and Life Sciences,  
12 University of California-Riverside.

13 <sup>5</sup>Department of Pediatrics, University of California - San Diego, La Jolla, CA, 92093.

14

15

16

17

18

19

20 \*Author to whom correspondence should be addressed:

21 Dietrich School of Arts and Sciences

22 Department of Biological Sciences

23 University of Pittsburgh

24 Life Sciences Annex 101

25 Pittsburgh, PA. 15260

26 email: [boylej@pitt.edu](mailto:boylej@pitt.edu)

27 **ABSTRACT**

28 *Toxoplasma gondii* is an obligate intracellular parasite that has a significant impact on  
29 human health, especially in the immunocompromised. This parasite is also a useful genetic  
30 model for intracellular parasitism given its ease of culture in the laboratory and relevant animal  
31 models. However, as for many other eukaryotes, the *T. gondii* genome is incomplete, containing  
32 hundreds of sequence gaps due to the presence of repetitive and/or uncloneable sequences  
33 that prevent complete telomere-to-telomere de novo chromosome assembly. Here, we report  
34 the first use of single molecule DNA sequencing to generate near complete de novo genome  
35 assemblies for *T. gondii* and its near relative, *N. caninum*. Using the Oxford Nanopore Minion  
36 platform, we dramatically improved the contiguity of the *T. gondii* genome (N50 of ~6.6Mb) and  
37 increased overall assembled sequence compared to current reference sequences by ~2 Mb.  
38 Multiple complete chromosomes were fully assembled as evidenced by clear telomeric repeats  
39 on the end of each contig. Interestingly, for all of the *Toxoplasma gondii* strains that we  
40 sequenced (RH, CTG, II×III F1 progeny clones CL13, S27, S21, and S26), the largest contig  
41 ranged in size between 11.9 and 12.1 Mb in size, which is larger than any previously reported *T.*  
42 *gondii* chromosome. This was due to a repeatable and consistent fusion of chromosomes VIIb  
43 and VIII. These data were further validated by mapping existing *T. gondii* ME49 Hi-C data to our  
44 assembly, providing parallel lines of evidence that the *T. gondii* karyotype consists of 13, rather  
45 than 14, chromosomes. In addition revising the molecular karyotype we were also able to  
46 resolve hundreds of repeats, including short tandem repeats and larger tandem gene  
47 expansions. For well-known host-targeting effector loci like rhoptry protein 5 (ROP5) and  
48 mitochondrial association factor 1 (MAF1), we were also able to accurately determine the  
49 precise gene count, order, sequence and orientation. Finally, when we compared the *T. gondii*  
50 and *N. caninum* assemblies we found that while the 13 chromosome karyotype was conserved,  
51 we determined that previously unidentified large scale translocation events occurred in *T. gondii*  
52 and *N. caninum* since their most recent common ancestry.

## 54 INTRODUCTION

55 *Toxoplasma gondii* and its Apicomplexan relatives are highly successful animal pathogens,  
56 infecting a wide variety of warm-blooded animals including humans and domesticated animals.  
57 *T. gondii* infection can lead to severe toxoplasmosis in immunocompromised individuals and in  
58 congenitally-infected fetuses (Joynson and Wreghitt 2005), and is a leading cause of blindness  
59 due to its ability to infect the eye causing ocular toxoplasmosis (Jones and Holland 2010). *T.*  
60 *gondii* belongs to the phylum Apicomplexa, a large group of animal and human pathogens  
61 including *Neospora*, *Eimeria*, *Plasmodium* and *Cryptosporidium*. The ease of genetic  
62 manipulation, accessibility to cellular and biochemical experiments, and well-established animal  
63 model make *T. gondii* an important system for studying the biology of Apicomplexans (Kim and  
64 Weiss 2004). Genomic analysis tools for this organism have been under development for  
65 decades. Data housed at ToxoDB.org, the primary genomic repository for *T. gondii* genome-  
66 wide data, presently includes sequence, *de novo* assemblies and annotation of multiple *T.*  
67 *gondii* genomes, next-generation sequence data for an additional 60 *T. gondii* genomes, as well  
68 as draft assemblies for both *Hammondia hammondi* and *Neospora caninum* (Lorenzi *et al.*  
69 2016).

70 Availability of a complete reference genome that contains accurate representations of all  
71 small- or large-scale structural variants is essential to have a better understanding of gene  
72 content, genotype-phenotype relationships, and the evolution of unique traits in parasites of  
73 humans and other animals. However, like all eukaryotic genomes, a substantial part of the *T.*  
74 *gondii* genome consists of repetitive elements (Matrajt *et al.* 1999), making gap-free *de novo*  
75 assembly impossible using standard 1st or 2nd generation sequencing approaches. Even with  
76 exceptionally high coverage, these approaches fail to resolve repetitive regions or complex  
77 structural variants with repeat units that are larger than the size of the individual reads. Three of  
78 the *T. gondii* reference genomes in ToxoDB (Gajria *et al.* 2008) were constructed by combining  
79 high quality 1st generation Sanger (Sanger *et al.* 1977) and 2nd generation 454 (Roche Applied

80 Science) sequence data, yet these genomes still have hundreds of sequence gaps of unknown  
81 sequence content and length. Assembly gaps typically mask repetitive regions which can  
82 contain previously unknown protein-coding genes, additional copies of genes found in tandem  
83 gene arrays, and in some cases, they may also lead to incorrect predictions of chromosomal  
84 structure. This problem is not unique to *T. gondii* and other apicomplexan genomes. For  
85 example, all versions of the human genome have thousands of gaps due to incorrect assembly  
86 of repetitive sequence (Vollger *et al.* 2019), including assemblies generated recently using new  
87 sequencing technologies like those applied here.

88         In recent years single molecule sequencing approaches (developed by Oxford Nanopore  
89 and PacBio) have revolutionized *de novo* sequence assembly by enabling high-throughput  
90 generation of kilobase-sized sequence reads. These approaches have allowed for resolution of  
91 the vast majority of repeat-driven sequence assembly gaps, the detection and assembly of  
92 previously intractable structural variants with species, and when combined with 2nd generation  
93 sequencing data can be used to generate near-complete *de novo* genome assemblies with high  
94 (>99%) nucleotide accuracy. Indeed, whole genome assemblies of several organisms including  
95 bacteria (Madoui *et al.* 2015; Fournier *et al.* 2017; Diaz-Viraque *et al.* 2018), parasites (Lapp *et*  
96 *al.* 2018), plants (Schmidt *et al.* 2017; Michael *et al.* 2018), and mammals (Jain *et al.* 2018)  
97 using a such a hybrid approach have been reported, generating assemblies of unprecedented  
98 contiguity. Here, we apply Oxford Nanopore sequencing and *de novo* assembly using the  
99 Minion Platform to multiple isolates of *T. gondii*, F1 progeny of a cross between two canonical *T.*  
100 *gondii* strains, and one of its nearest extant relatives, *Neospora caninum*. Using these data, we  
101 have generated gap-free, telomere-to-telomere assemblies for the majority of the *T. gondii*  
102 chromosomes from each sequenced isolate and/or species. These assemblies revise the  
103 molecular karyotype for *T. gondii*, formally establishing that this parasite has 13, rather than 14,  
104 chromosomes. This result was confirmed by Hi-C sequencing technologies as described  
105 previously (Bunnik *et al.* 2019). This karyotype is conserved across all *T. gondii* parasite strains

106 that we sequenced, and is also conserved in *N. caninum*. Our new assemblies have also  
107 resolved copy number estimates at simple- and complex repetitive loci, including multiple  
108 tandem gene arrays harboring known host-targeting effector genes. Moreover, by directly  
109 assembling genomes from multiple F1 progeny experimental crosses, we have determined for  
110 the first time that changes in gene copy number occur during sexual recombination, and that  
111 this occurs frequently at some *T. gondii* loci (like the ROP5 locus) and infrequently at others  
112 (like the MAF1 locus), and may explain some of the differences in pathogenicity between *T.*  
113 *gondii* strains. Finally, our *de novo* assembly of the *N. caninum* Liverpool genome shows that  
114 the current draft assembly of this organism dramatically overestimates chromosome-level  
115 synteny with *T. gondii*. This discovery is also corroborated in multiple *N. caninum* strains in a  
116 companion paper (See cover letter for details on co-submitted manuscript).

117

## 118 **RESULTS**

### 119 ***De novo* assembly of *TgRH88* genome using nanopore reads revises the *T. gondii*** 120 **karyotype**

121 The majority of the *T. gondii* isolates collected from North America and Europe belong to three  
122 predominant clonal lineages, types I, II, and III (Sibley and Ajioka 2008) and RH strain is a  
123 representative strain of the type I lineage (Pfefferkorn and Pfefferkorn 1976). While RH strain  
124 shows some unique phenotypes including higher growth rate *in vitro* and inability to form cysts  
125 (Villard *et al.* 1997; Khan *et al.* 2009) and is most frequently used in *T. gondii* studies, a  
126 complete *de novo* assembly for *TgRH* genome is lacking. Therefore, our initial efforts were to  
127 use long read single molecule sequencing to generate a more complete *TgRH88* assembly.

128 To take advantage of the long-read technology, HMW genomic DNA of *TgRH88* strain was  
129 extracted using an optimized protocol which was originally designed for extraction of gram-  
130 negative bacteria and mammalian cell DNA (Quick 2018). This protocol included a phenol-  
131 chloroform-isoamyl alcohol extraction followed by ethanol precipitation, and the use of large

132 bore pipette tips for all manipulations (see Materials and Methods). For TgRH88, we obtained  
133 24  $\mu\text{g}$  of genomic DNA from  $2 \times 10^8$  tachyzoites, and 400 ng was used for MinION sequencing.  
134 A 48-hour sequencing run on a single flow cell yielded 648,491 reads containing 7.40 Gb of  
135 sequences for TgRH88 genome. Assuming a 65 Mb *T. gondii* genome size, these reads  
136 represented a genome coverage of  $\sim 114\times$ . While more detailed sequence metrics are described  
137 below, the sequence reads we obtained robustly aligned to the TgGT1 reference genome found  
138 at ToxoDB.org (**Figure 1A**).

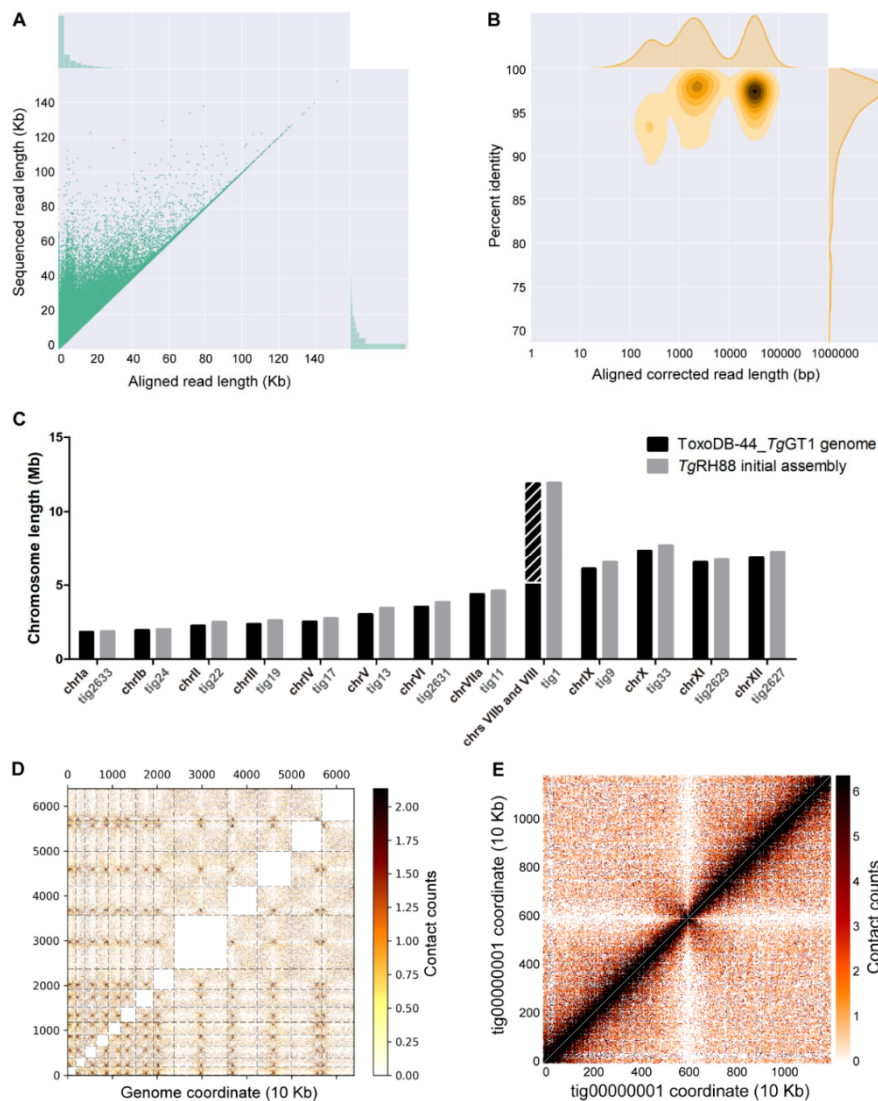

139

140 **Figure 1. Primary de novo assembly of TgRH88 genome using nanopore**  
141 **reads revises *T. gondii* karyotype. (A) Bivariate plot showing a comparison**  
142 **of the aligned read length with the sequencing read length. (B) Bivariate plot**

143 showing a comparison of the aligned corrected read length ( $\log_{10}$   
144 transformed) with the percent identity. (C) Histogram showing comparison of  
145 chromosome size between ToxoDB-44\_TgGT1 genome and TgRH88 initial  
146 long-read assembly. (D) Interchromosomal Hi-C contact-count heat map  
147 plotted using the TgRH88 initial long-read assembly sequence showing 13  
148 chromosomes in the assembly. (E) Intrachromosomal Hi-C contact-count heat  
149 map plotted using the sequence of tig00000001 in TgRH88 initial long-read  
150 assembly showing no aberrant signal along the contig

151 Before assembly, Canu v1.7.1 corrected all reads > 1000 bp, and after alignment we found  
152 that 99.97% of the corrected TgRH88 reads could be mapped to the reference genome, and the  
153 mean percent identity was 92.9% (**Figure 1B**). The resulting Canu-corrected reads were  
154 subjected to *de novo* assembly using Canu v1.7.1, which yielded a TgRH88 primary assembly  
155 with a size of 64.40 Mb. The assembly consisted of 23 contigs and 6 of them contained  
156 telomeric repeat sequences (TTTAGGG or CCCTAAA) on at least one end. Interestingly, by  
157 aligning the TgRH88 assembly sequences to the reference genome, we noticed that the  
158 sequences annotated as chrVIIb and chrVIII in the ToxoDB-44\_TgGT1 genome were parts of a  
159 single contig in our TgRH88 assembly (tig1; **Figure 1C**). This contig, which was 11.93 Mb in  
160 length, was longer than any previously reported *T. gondii* chromosome, and suggested to us  
161 that *T. gondii* consists of 13 (instead of 14) chromosomes, with the chrVIIb and chrVIII being  
162 actually a single chromosome. Given that prior work using Hi-C chromosome conformation  
163 capture sequencing suggesting a similar fusion between chromosomes VIIb and VIII (Bunnik *et*  
164 *al.* 2019), we mapped the Hi-C reads from that study onto our TgRH88 *de novo* assembly to  
165 determine if it has similar contact counts. As shown in **Figure 1D** the Hi-C data identified the  
166 position of 13, rather than 14, interchromosomal contact points (representing centromeres;  
167 (Bunnik *et al.* 2019)) and an intrachromosomal contact map across TgRH88 tig1 indicating that  
168 this did indeed represent a single contiguous chromosome (**Figure 1E**). These findings provide  
169 direct assembly-based evidence that sequence fragments previously referred to as distinct  
170 chromosomes (VIIb and VIII) were in fact two parts of the same chromosome.

171 **Nanopore read quality assessment and *de novo* genome assembly statistics**

172 To determine whether the chr VIIb/VIII fusion was unique to TgRH88 or present in other  
173 isolates, we sequenced and assembled genomes of TgME49, TgCTG, TgME49×TgCTG F1  
174 progeny (CL13, S27, S21, S26, and D3X1), and *N. caninum* Liverpool strain (**Table 1**) by  
175 performing 6 MinION runs with 6 R9.4.1 flow cells. On average, a single flow cell yielded  
176 approximately 600,000 reads containing more than 7.8 Gb of sequences over a 48-hour run,  
177 and for each strain, total yield varied from 0.6 Gb to 7.4 Gb (**Table S2**). The read length N50s  
178 (the sequence length of the shortest read at half of the total bases) were longer than 18 Kb, and  
179 the maximum read lengths varied between 116 Kb and 266 Kb (**Table S2**). The average Phred  
180 quality scores (a measure of the quality of the base-call, representing the estimated probability  
181 of an error (Ewing and Green 1998; Ewing *et al.* 1998)) for all libraries were ~10.0, except for  
182 the TgRH88 library, whose average Phred score was 8.9 (**Table S2**). Aligning the reads against  
183 their most relevant “Reference” genome in ToxoDB (based on species and then closest  
184 genotype) revealed that 96% of the *T. gondii* reads and 85% of the *N. caninum* reads could be  
185 mapped, with a mean percent identity of ~86% (**Table S2**). After reads were corrected using  
186 error-correction in Canu, 99% of the *T. gondii* reads and 98.07% of the *N. caninum* reads could  
187 be mapped to their reference genomes, and the mean percent identities were ~95% (**Table S3**).  
188 This first round of error correction (based on alignment and overlap between Nanopore reads as  
189 implemented in Canu; (Koren *et al.* 2017)) was sufficient for making conclusions about  
190 previously unappreciated structural variation within and between species.

191 **Table 1. Description of the *T. gondii* and *N. caninum* strains sequenced in this study.**

| Species                  | Strain    | Genotype (ToxoDB PCR-RFLP genotype) | Geographical origin | Host  | References                       |
|--------------------------|-----------|-------------------------------------|---------------------|-------|----------------------------------|
| <i>Toxoplasma gondii</i> | RH88      | Type I (ToxoDB #10, Type I)         | USA                 | Human | Sabin, 1941                      |
| <i>Toxoplasma gondii</i> | ME49      | Type II (ToxoDB #1, Type II)        | USA                 | Sheep | Kasper and Ware, 1985            |
| <i>Toxoplasma gondii</i> | CTG       | Type III (ToxoDB #2, Type III)      | USA                 | Cat   | Pfefferkorn <i>et al.</i> , 1977 |
| <i>Toxoplasma gondii</i> | CL13      | Types II×III F1 progeny             | USA                 | Cat   | Sibley <i>et al.</i> , 1992      |
| <i>Toxoplasma gondii</i> | S27       | Types II×III F1 progeny             | USA                 | Cat   | Sibley <i>et al.</i> , 1992      |
| <i>Toxoplasma gondii</i> | S21       | Types II×III F1 progeny             | USA                 | Cat   | Sibley <i>et al.</i> , 1992      |
| <i>Toxoplasma gondii</i> | S26       | Types II×III F1 progeny             | USA                 | Cat   | Sibley <i>et al.</i> , 1992      |
| <i>Toxoplasma gondii</i> | D3X1      | Types II×III F1 progeny             | USA                 | Cat   | Saeij <i>et al.</i> , 2007       |
| <i>Neospora caninum</i>  | Liverpool | -                                   | USA                 | Dog   | Dubey <i>et al.</i> , 1988       |

192



193

194 The primary assemblies had a median number of contigs of 38.5 for the *T. gondii* strains  
195 and 58 for the *N. caninum* Liverpool strain (**Table S4**). The median assembly size of the *T.*  
196 *gondii* strains was 64 Mb, with a median contig length N50 of 6.63 Mb, and a median L50 of 4  
197 (**Table S4**). The *N. caninum* primary assembly had a size of 61.8 Mb, with a contig N50 size of  
198 6.38 Mb and an L50 of 4 (**Table S4**). Although the mean percent identity of the aligned Canu-  
199 corrected reads to the reference genome (~95%) was improved compared to the raw reads  
200 (~86%), we used a second round of error correction to improve sequence accuracy. To do this,  
201 we mapped whole-genome Illumina paired-end reads (SRA: SRR5123638, SRR2068653,  
202 SRR5643140, or ERR701181) to the *TgRH88*, *TgME49*, *TgCTG*, or *NcLiv* primary assemblies  
203 generated by Canu, and iteratively polished the assembly contigs four times using Pilon v1.23.  
204 The polished contigs were then reassembled using Flye v2.5. The resulting contigs/scaffolds  
205 were then assigned, ordered, and oriented to chromosomes using relevant ToxoDB-44  
206 reference genomes (**Table S1**). These polished assemblies have been deposited in Genbank  
207 (Accession numbers pending).

208 The final assemblies of *TgRH88*, *TgME49*, or *TgCTG* consisted of 13 chromosome  
209 contigs/scaffolds and varying numbers of unplaced fragments, with an average total size of  
210 ~64.8 Mb (**Table 2**). The polished *N. caninum* Liverpool assembly was composed of 58 contigs,  
211 showing a cumulative size of 62.1 Mb (**Table 2**). For all species and strains, the long reads and  
212 high coverage led to highly improved contiguity of our assemblies compared to the reference  
213 genomes. As reported in **Table 2**, with one exception (IlxIII F1 progeny S26), all the *T. gondii*  
214 final assemblies were composed of 23-59 contigs, representing a 43-109-fold reduction in the  
215 number of contigs in comparison to the ToxoDB-44\_ *TgME49* assembly (2511 contigs; **Table 2**).  
216 For *N. caninum*, compared to the existing assembly of the *NcLiv* genome (Reid *et al.* 2012), the  
217 total number of contigs in the *NcLiv* final assembly was reduced from 247 to 58 (**Table 2**). The  
218 contiguity improvement of long-read assembly was also evident by high contig length N50

219 values and low L50 values in these assemblies (**Table 2**). Furthermore, for all the long-read  
 220 assemblies, 55.2% of all chromosomes were fully assembled in single contigs and flanked by  
 221 two telomeric repeats with proper orientation (e.g., one end 5'-3' TTTAGGG and the other 5'-3'  
 222 CCCTAAA; **Table S5**). This is in contrast to version 44 of the *T. gondii* ME49 genome housed at  
 223 ToxoDB where 3 of the 14 chromosome assemblies have telomeric repeats on both ends, 7  
 224 have a telomeric repeat on one end, and the remaining 4 putative chromosomes have no  
 225 telomeric repeats at all. Upon aligning our assemblies to their respective reference genomes  
 226 (**Table S1**), we found that over 95.9% of the *TgRH88*, *TgME49*, or *TgCTG* final assembly  
 227 sequences could be mapped to their relevant reference genome. The alignments revealed that  
 228 our *de novo* assemblies had fewer mismatches and indels per 100 Kb and higher longest  
 229 alignment and total aligned length when compared to the assemblies housed on ToxoDB (**Table**  
 230 **3**). To assess genome assembly completeness, we used BUSCO analysis on the polished  
 231 *TgRH88*, *TgME49*, and *TgCTG* assemblies and compared the results to a similar analysis for  
 232 the unpolished assemblies. This analysis, which counts the number of single-copy orthologs  
 233 unambiguously identified in a genome assembly, found that for 215 such loci 88% of the  
 234 complete genes were recovered from the polished, long read based assemblies, while 23.3 -  
 235 54% were identified in the unpolished assemblies (**Table 3**). These data show the utility of our  
 236 sequence polishing for improving the accuracy of the assembly.

237 **Table 2. Metrics of long-read assemblies and the reference genomes.**

|                                        | Reference genome |               |            | Long-read assembly in this study |               |              |            |                 |            |            |            |       |
|----------------------------------------|------------------|---------------|------------|----------------------------------|---------------|--------------|------------|-----------------|------------|------------|------------|-------|
|                                        | ToxoDB-44        | <i>TgME49</i> | ENA_NcLiv  | <i>TgRH88</i>                    | <i>TgME49</i> | <i>TgCTG</i> | F1_CL13    | F1_S27          | F1_S21     | F1_S26     | F1_D3X1    | NcLiv |
| # contigs                              | 2511             | 247           | 234        | 23 <sup>1</sup>                  | 38            | 29           | 36         | 59 <sup>2</sup> | 32         | 236        | 39         | 58    |
| # scaffold gaps                        | 267              | 234           | 2          | 0                                | 0             | 0            | 0          | 1               | 0          | 0          | 0          | 0     |
| Total bases (bp)                       | 65,464,242       | 57,524,120    | 64,918,878 | 64,923,798                       | 64,731,950    | 64,701,501   | 64,164,327 | 63,627,129      | 60,431,397 | 63,972,942 | 62,076,476 |       |
| Maximum contig length (bp)             | 4,347,958        | 1,378,223     | 12,065,564 | 12,088,238                       | 12,092,387    | 8,806,958    | 12,022,215 | 11,984,269      | 1,624,740  | 11,993,556 | 10,862,166 |       |
| Contig length N50 (bp)                 | 1,219,553        | 405,161       | 6,778,623  | 6,675,137                        | 6,680,781     | 3,584,337    | 6,640,858  | 6,624,864       | 476,673    | 5,127,130  | 6,406,690  |       |
| L50                                    | 17               | 50            | 4          | 4                                | 4             | 6            | 4          | 4               | 36         | 4          | 4          |       |
| Contig length N75 (bp)                 | 609,575          | 224,642       | 3,884,487  | 3,410,322                        | 3,832,413     | 2,159,680    | 2,970,120  | 3,316,180       | 264,689    | 3,250,471  | 3,004,054  |       |
| L75                                    | 35               | 97            | 7          | 8                                | 7             | 12           | 8          | 8               | 78         | 9          | 9          |       |
| GC (%)                                 | 52.29            | 54.85         | 52.46      | 52.35                            | 52.34         | 52.44        | 52.44      | 52.42           | 52.31      | 52.37      | 54.66      |       |
| <sup>1</sup> 20 contigs and 1 scaffold |                  |               |            |                                  |               |              |            |                 |            |            |            |       |
| <sup>2</sup> 57 contigs and 1 scaffold |                  |               |            |                                  |               |              |            |                 |            |            |            |       |

238

239

240

241

242 **Table 3. Metrics of the long-read assemblies before and after polishing.**

|                                 | <i>Tg</i> RH88   |                | <i>Tg</i> ME49   |                | <i>Tg</i> CTG    |                |
|---------------------------------|------------------|----------------|------------------|----------------|------------------|----------------|
|                                 | Initial assembly | Final assembly | Initial assembly | Final assembly | Initial assembly | Final assembly |
| <b>Contiguity</b>               |                  |                |                  |                |                  |                |
| # contigs/scaffolds             | 23               | 21             | 38               | 38             | 38               | 29             |
| Total bases (bp)                | 64,401,064       | 64,918,878     | 64,522,756       | 64,923,798     | 64,789,158       | 64,731,950     |
| Maximum contig length(bp)       | 11,930,269       | 12,055,564     | 12,002,493       | 12,088,238     | 12,040,189       | 12,092,387     |
| Contig/scaffold length N50 (bp) | 6,718,904        | 6,778,623      | 6,635,075        | 6,675,137      | 6,653,560        | 6,680,781      |
| <b>Accuracy</b>                 |                  |                |                  |                |                  |                |
| Genome fraction (%)             | 97.514           | 97.470         | 95.914           | 95.915         | 98.367           | 98.353         |
| # mismatches per 100 Kbp        | 85.91            | 57.33          | 61.34            | 49.82          | 47.85            | 44.11          |
| # indels per 100 Kbp            | 706.9            | 35.1           | 537.5            | 26.59          | 348.43           | 21.94          |
| Largest alignment (bp)          | 2,737,008        | 2,768,614      | 4,425,732        | 4,452,657      | 2,573,606        | 2,584,520      |
| Total aligned length (bp)       | 62,839,196       | 63,538,670     | 63,828,373       | 64,235,943     | 63,473,895       | 63,611,317     |
| <b>Completeness</b>             |                  |                |                  |                |                  |                |
| Complete BUSCOs protists (%)    | 23.3             | 88.9           | 39.1             | 91.6           | 54.0             | 91.2           |
| Fragmented BUSCOs protists (%)  | 0.9              | 0.0            | 1.4              | 0.0            | 1.9              | 0.0            |
| Missing BUSCOs protists (%)     | 75.8             | 11.1           | 59.5             | 8.4            | 44.1             | 8.8            |

243

244

### 245 **Long-read assembly identifies 13 chromosomes in multiple *T. gondii* genomes**

246 To assess the structural correctness of the long-read assemblies, we aligned our *T. gondii*  
247 assembly sequences to the reference genome. As can be seen in **Figure S1**, all of the *T. gondii*  
248 long-read assemblies exhibited strong collinearity with their corresponding reference genomes,  
249 barring a small number of putative inversions. Consistent with our finding for *Tg*RH88 primary  
250 assembly, the chr VIIb/VIII fusion was observed in each of our *T. gondii* assemblies (*Tg*ME49 is  
251 represented in **Figure 2A**, red box; and **Figure S1A,B**). To further confirm this observation, we  
252 aligned our *Tg*ME49 corrected reads back against the *Tg*ME49 long-read assembly and found  
253 an average read depth of 40× for the entirety of tig00000001, and 37× for the “breakpoint”  
254 (tig00000001: 5090422 bp) of chrVIIb and chrVIII, indicating that this was unlikely due to an  
255 assembly error (**Figure 2B**). We then mapped the corrected nanopore reads again to the  
256 ToxoDB-44\_ *Tg*ME49 reference genome, and the alignments showed that all of the reads that  
257 were mapped either to the end of chrVIIb or to the beginning of chrVIII spanned the gap  
258 between the two chromosomes, with an average coverage of 105× (**Figure 2C**). This link  
259 between reads aligning to chromosome ends was not present in any other chromosome pair (for  
260 instance, between chromosomes IX and X; **Figure 2D**).

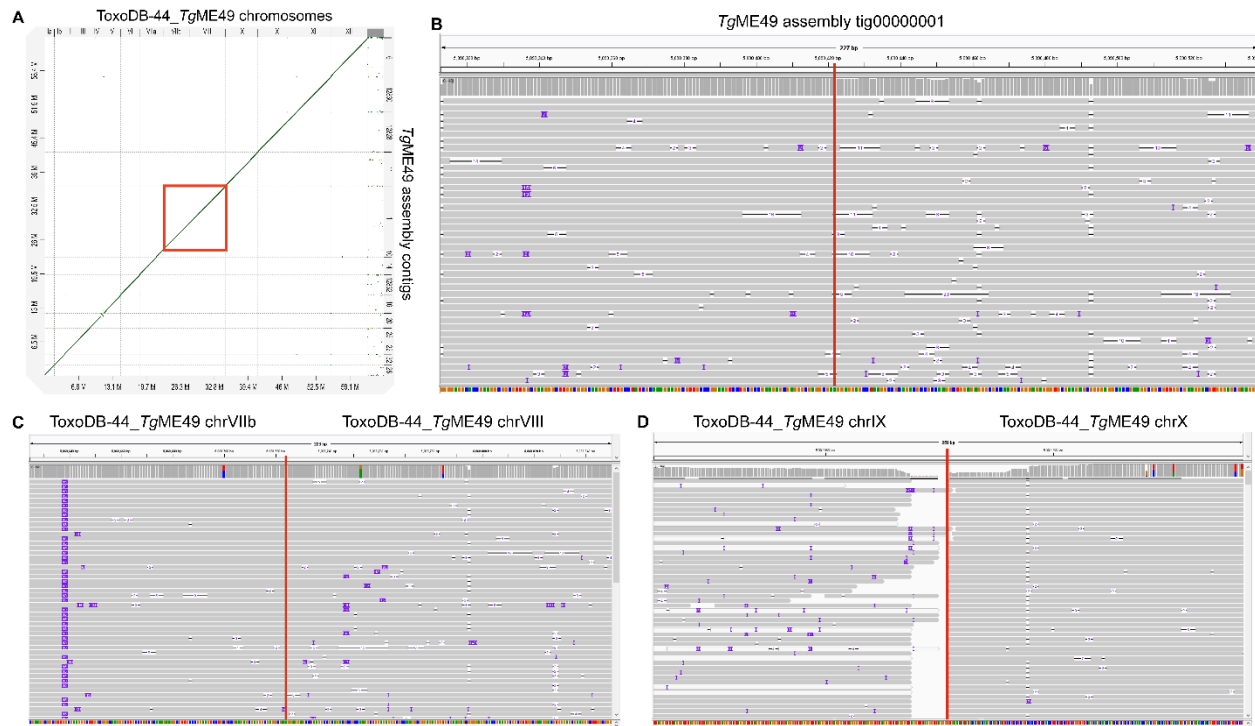

261

262 **Figure 2. Long-read assembly identifies 13 chromosomes in *T. gondii***  
263 **genome. (A)** Dot plot showing the comparison of the TgME49 long-read  
264 assembly and the ToxoDB-44\_TgME49 genome. Red box shows that the  
265 chromosomes VIIb and VIII in the ToxoDB-44\_TgME49 genome are fused in a  
266 single contig, tig00000001, in the TgME49 long read assembly. (B) Coverage  
267 of the "breakpoint" (tig00000001: 5090422 bp, indicated by a vertical red line)  
268 of chromosomes VIIb and VIII with 37 Nanopore reads in the TgME49 long-  
269 read assembly. (C) Coverage of the edges (indicated by a vertical red line) of  
270 chromosomes VIIb and VIII with 105 Nanopore mapped to the ToxoDB-  
271 44\_TgME49 genome. (D) Nanopore reads mapping to the end of  
272 chromosomes IX and X in the ToxoDB-44-TgME49 genome assembly,  
273 showing that Nanopore reads only map to the end of each chromosome and  
274 do not span the junction between these chromosomes (indicated by a vertical  
275 red line).

276 This observation of a fusion between chrVIIb and chrVIII was in agreement with the  
277 observations in our TgRH88 assembly described above (**Figure 1C-E**). Similarly, when we  
278 mapped Hi-C data from (Bunnik *et al.* 2019) was aligned to our TgME49 long read assembly,  
279 the resulting interchromosomal contact-count map revealed 13 chromosomes in the TgME49  
280 long read assembly by showing that each chromosome exhibited a single centromeric  
281 interaction with each other chromosome, and that tig00000001 was a complete single  
282 chromosome (**Figure S2B**). The intrachromosomal contact-count map of tig00000001 showed a

283 strong and broad diagonal and no aberrant signal along the contig or at the the “breakpoint” of  
284 chrVIIb and chrVIII (**Figure S2B**). Similar patterns were also observed in our *Tg*CTG, S27, and  
285 S21 assemblies (**Figure S2**). Collectively, these data show the *T. gondii* karyotype has been  
286 incorrectly calculated and contains 13, rather than 14, chromosomes. We refer to this fused  
287 chromosome as chrVIII in our assembly and have eliminated chrVIIb.

288 The *Tg*CTG and *Tg*RH88 assemblies had chromosome scale resolution, where 13  
289 contiguous sequences (contigs) corresponded to the 13 chromosomes. However, the S21, S27,  
290 and *Tg*ME49 assemblies had several chromosomes composed of two to three large contigs. Hi-  
291 C data has historically been used to improve genome assemblies on the basis of contact  
292 frequency depending strongly on one-dimensional distance (Dudchenko et al. 2017). That is, Hi-  
293 C alignment to contigs in the correct order and orientation would reveal the canonical  
294 intrachromosomal pattern of enriched interactions along the diagonal (where one-dimensional  
295 genomic distance between bins is the smallest). Hi-C alignment to contigs in the incorrect order  
296 and orientation would be illustrated by patterns associated with large-scale inversions, where  
297 there is a high interaction frequency between bins placed far away from each other. Leveraging  
298 this, we were able to assemble the contigs for chromosomes ChrII, ChrVIIa, ChrIX in S21,  
299 ChrIII, ChrIV, ChrV and ChrX in S27, and ChrVIIa in *Tg*ME49. All concatenations have 100 'N'  
300 bases in between contigs and are listed below in the order in which they have been  
301 concatenated.

302 For S21 chrII, we inverted tig00000072 and concatenated tig00000072 and tig00000055.  
303 For S21 chrVIIa, we concatenated tig00000090 and tig00012823. For S21 chrIX, we  
304 concatenated tig00000042 and tig00000018. For S27 chrIII, we inverted tig00000090 and  
305 concatenated tig00017745 and tig00000090. For S27 chrIV, we concatenated tig00000192,  
306 tig00000094, and tig00000043. For S27 chrV, we concatenated tig00000162 and tig00017744.  
307 For S27 chrX, we concatenated tig00000154 and tig00000012. Finally, for *Tg*ME49 chrVIIa, we  
308 inverted tig00000014 and concatenated tig00000014 and tig00000010.

309

## 310 **Long-read assembly resolves duplicated locus structure in the *T. gondii* genome**

311 Many scaffold gaps within chromosomes remain unresolved (**Table 2**) in the *T. gondii*  
312 reference genome particularly in the regions that contain repeated elements. Our long read  
313 assembly closed nearly all of the gaps in the *T. gondii* and *N. caninum* genomes (Tables 2 and  
314 S6). Furthermore, many unplaced sequences in the *T. gondii* reference genome were  
315 assembled into contigs in our assembly. For instance, the unplaced contig KE140372 in the  
316 ToxoDB-44\_*TgME49* genome, which was 2194 bp in length and contained a sequence  
317 encoding a rhopty protein 4 paralog, was assembled in tig00000028\_chrla in our *TgME49*  
318 assembly. Unplaced contigs in the ToxoDB-44\_*TgGT1* genome, AAQM03000823 and  
319 AAQM03000824, were assembled in contig\_13\_chrIII in our *TgRH88* assembly.

320 The gap closure enabled us to determine the exact number, order, orientation, and  
321 sequence of *T. gondii* duplicated loci like *ROP7*, *ROP5*, *ROP38*, *MIC17*, *MAF1*, and *TSEL8*.  
322 The *ROP7* locus is represented in **Figure 3A**, where we identified two unresolved scaffold gaps  
323 on chrla in the ToxoDB-44\_*TgME49* genome (black bars), and these gaps marked the site of  
324 *ROP4/7* locus. This entire region was spanned by a single contig, tig00000028, in our *TgME49*  
325 assembly (the blue bar in **Figure 3A**). Aligning the *ROP7* genomic sequence (ToxoDB:  
326 TGME49\_295110) against tig00000028 using BLASTN revealed 3 copies of the *ROP7* repeat,  
327 while only one was predicted in the ToxoDB-44\_*TgME49* genome (Figures 3A and 3B)  
328 Interestingly, while the ToxoDB-44\_*TgME49* genome identified one copy of the *ROP4* gene  
329 (GenBank: EU047558.1), our *TgME49* assembly showed that 2 copies of *ROP4* exist this locus,  
330 one of which was found between the first and the second copy of *ROP7* (**Figure 3B**). To  
331 validate this finding, we identified 12 individual Canu-corrected reads that spanned this entire  
332 tandem array, and each one that we examined provided evidence for 3 copies of *ROP7* and 2  
333 copies of *ROP4* arranged in the order ROP4\_1-ROP7\_1-ROP4\_2-ROP7\_2-ROP7\_3 (**Table**  
334 **S6**). The copy number and copy order of other known tandem locus expansions (taken from the

335 supplementary table in (Adomako-Ankomah *et al.* 2014)) in the strains we sequenced were  
 336 identified and are listed in **Table S6**. Surprisingly, we observed changes in copy number at  
 337 some of these loci when we compared the parental (*TgME49* or *TgCTG*) and the progeny  
 338 (CL13, S27, S21, S26, and D3X1) assemblies (**Figure 3C**). For example, while the *ROP5* locus  
 339 had 9 copies in our *TgME49* assembly and 4 in our *TgCTG* assembly, it harbored 6 copies in  
 340 the F1 progeny S27 and S21, and 7 in S26 (**Figure 3C**). There was an array of 7 tandem copies  
 341 of *MIC17* in *TgME49* and *TgCTG* assemblies, whereas it was present in 6 copies in the S26  
 342 assembly (**Figure 3C**). These data indicated that changes in copy number and order at tandem  
 343 gene arrays can occur during sexual recombination. All the new members of the tandem gene  
 344 arrays and the novel repeated sequences identified here were the result of gap resolution and  
 345 improved overall contiguity of the genome.

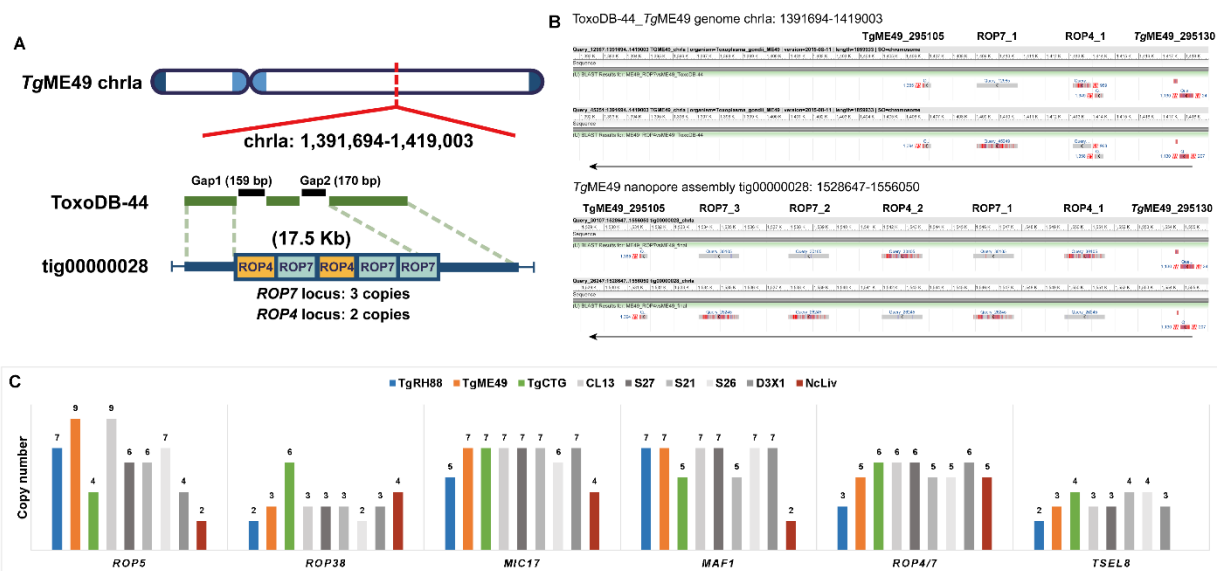

346

347 **Figure 3. Long-read assembly resolves duplicated locus structure in *T.***  
 348 ***gondii* genome. (A) Two unresolved scaffold gaps on chrla in ToxoDB-**  
 349 **44\_ *TgME49* genome span a 17.5-Kb tandem repeat containing multiple**  
 350 **copies of *ROP4* and *ROP7*. The *ROP4/7* gaps are closed by the *TgME49***  
 351 **long-read assembly (tig00000028), revealing a tandem array of 5 copies of**  
 352 **this gene in the order shown. (B) BLASTN alignment of the *ROP4/ROP7***  
 353 **coding sequence in the ToxoDB-44\_ *TgME49* genome (upper panel) and the**  
 354 ***TgME49* long-read assembly (lower panel). (C) Precise copy number**  
 355 **determination at 6 canonical tandem gene arrays across 8 *T. gondii* strains**  
 356 **and 1 *N. caninum* strain. Data from CL13, S27, S21 and S26 show that copy**

357 *number can change during sexual recombination since copy number in these*  
358 *F1 progeny clones do not match copy number in either parent.*

359

### 360 **Long-read assembly detects structural rearrangements in the *T. gondii* genome**

361 In addition to repeated elements, our assembly was capable of detecting gross structural  
362 rearrangements (insertions, deletions, inversions, relocations, and translocations) since the  
363 assembly based on long reads was highly contiguous and had near chromosome scale  
364 resolution. We aligned the final assemblies of the 8 *T. gondii* strains to the reference genomes  
365 and searched for structural variants using either Minimap2 (**Figure S1A**) or MUMmer (**Figure**  
366 **S1B**). Consistent with the data shown in **Figure S1**, most contigs in the long-read assemblies  
367 were collinear with the chromosomes in the ToxoDB-44 genomes, but not always in a 1:1  
368 correspondence. Interestingly, we observed a 15.7 Kb inversion on chrIII in our *TgRH88*  
369 assembly, which was absent in *TgME49*, *TgCTG*, or any F1 progeny assembly (**Figure 4A**). We  
370 also detected another ~20 Kb inversion on chrXII, which was present in *TgME49*, *TgCTG*, and  
371 the F1 progeny assembly, but not in the *TgRH88* assembly (*TgME49* is represented in **Figure**  
372 **4B**).



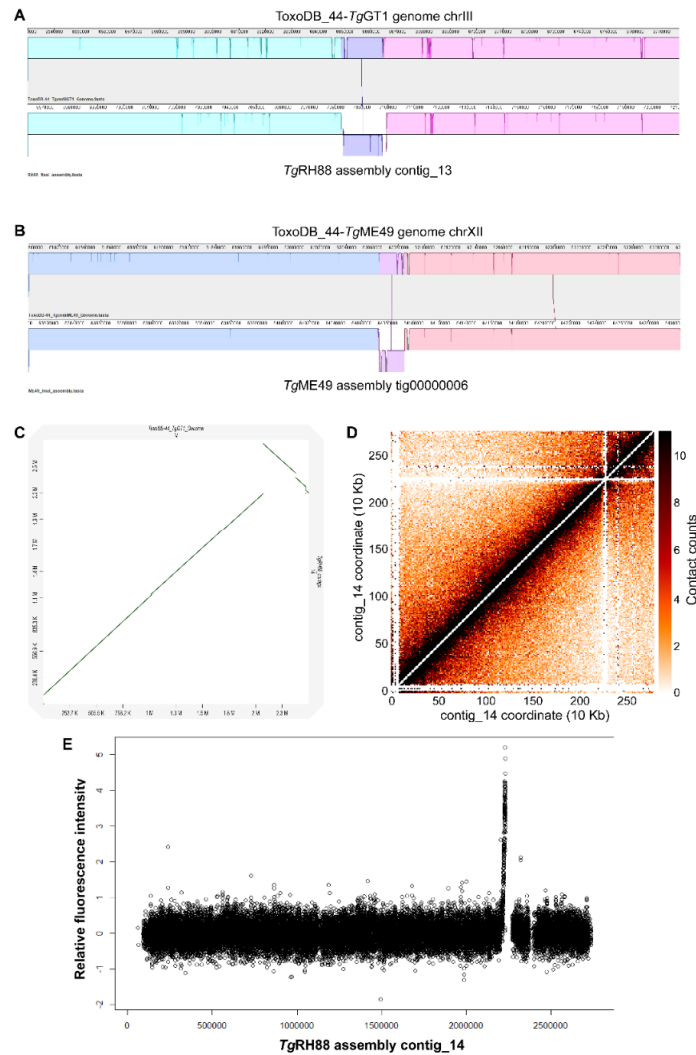

373

374 **Figure 4. Long-read assembly reveals previously unknown inversions**  
375 **and the centromere location on chrIV in *T. gondii*.** (A) Inversion in the  
376 RH88 long-read assembly on chromosome III relative to the ToxoDB-44-  
377 TgGT1 assembly. (B) Inversion in the ME49 long-read assembly on  
378 chromosome XII relative to the ToxoDB\_44-TgME49 genome. (C) Dot plot  
379 comparison of the TgRH88 long-read assembly and the ToxoDB-44\_TgGT1  
380 genome showing a 429.3-Kb inversion at 2,096,529-2,525,795 bp on chrIV.  
381 (D) Intrachromosomal Hi-C contact-count heat map plotted using the  
382 sequence of contig\_14 in TgRH88 long-read assembly showing a clear  
383 centromere signal at position 2.2-2.3 Mb. (E) ChIP-on-chip signal of  
384 centromeric histone 3 variant (CenH3) (Brooks et al. 2011) plotted using the  
385 TgRH88 long-read assembly as coordinate.

386 Centromeres for 12 of the 13 *T. gondii* chromosomes have been identified using ChIP-on-  
387 chip (chromatin immunoprecipitation coupled with DNA microarrays) of centromeric and peri-  
388 centromeric proteins, locations of centromere of chrVIIIb and chrIV remain unknown (Brooks et

389 *al.* 2011; Gissot *et al.* 2012). For chrVIIb, no hybridization of the centromeric probe to the  
390 genomic chip was detected in the ChIP-on-chip assay (Brooks *et al.* 2011), which could be  
391 explained by our observation that chrVIIb and chrVIII are a single chromosome, and the  
392 centromere of this large chromosome appears to be in the center of this “fused” chromosome, in  
393 an area that was previously thought to be the beginning of chromosome VIII (**Figure 1E**). For  
394 chromosome IV, two inconsecutive peaks of hybridization were detected at positions 2,501,171-  
395 2,527,417 bp on chrIV and 1-9968 bp in the unplaced contig AAQM03000753 in the *TgGT1*  
396 genome based on published ChIP-on-chip data (Brooks *et al.* 2011). Our *TgRH88* assembly  
397 successfully relocated the sequences in AAQM03000753 into chrIV and revealed a 430.9-Kb  
398 inversion event at 2,096,529-2,527,423 bp on chrIV relative to the ToxoDB GT1 reference  
399 genome (**Figure 4B**). This inversion was unlikely to be due to an assembly error since it was  
400 shown in all of our *T. gondii* assemblies, and was supported by alignment of 128 canu-corrected  
401 reads spanning the boundaries of the *TgRH88* assembly. When we mapped the ChIP-on-chip  
402 data obtained from (Brooks *et al.* 2011) to our *TgRH88* assembly (after remapping the probe  
403 sequences to our *TgRH88* assembly), we resolved the chrIV centromere to a single significant  
404 signal peak at 2.20-2.23 Mb on chrIV (**Figure 4C** and **Figure S3**). This finding was also  
405 supported by published Hi-C data re-aligned to our Nanopore assemblies, since the  
406 intrachromosomal contact count map showed a clear interchromosomal contact signal at 2.20-  
407 2.30 Mb on chrIV in the *TgRH88* assembly (**Figure 4B**). Collectively, our data not only resolved  
408 the molecular karyotype of *T. gondii*, but also resolved the precise location of the chrIV  
409 centromere.

410

#### 411 **Long-read assembly adds new sequences to the *T. gondii* reference genome**

412 As shown in **Figure 1C** and **Table S5**, each chromosome-sized contig of our long-read *de*  
413 *novo* assemblies was longer than its cognate chromosome of the ToxoDB-44 *T. gondii*  
414 reference genome, and for *TgRH88*, *TgME49* and *TgCTG* we were able to assemble between

415 1.7 and 3.9 Mb of previously unlocated and/or unassembled sequence to the chromosomes of  
416 these assemblies. These new sequences were scattered across the genome, and filled in nearly  
417 all of the sequence gaps found in the reference genome. The new sequences added by the  
418 long-read assemblies extended the subtelomeric regions of the chromosomes in the *T. gondii*  
419 reference genome. While 4 chromosomes of the ToxoDB-44\_*TgME49* genome contained no  
420 telomeric repeat and 7 were missing one of the telomeric repeats, all of the chromosome  
421 contigs in the *TgME49* long-read assembly were assembled up until both telomeric caps (**Table**  
422 **S5**). Both telomeres were found in 12 out of the 13 chromosomes in the *TgCTG* long-read  
423 assembly, and one chromosome contig lacked one of the telomeric repeats, whereas only 5  
424 chromosomes in the ToxoDB-44\_*TgVEG* genome contained one telomere and no telomeric  
425 repeat was found in the rest of the chromosomes (**Table S5**). Similarly, both telomeres in 7  
426 chromosomes and one telomere in 6 chromosomes were resolved in the *TgRH88* long-read  
427 assembly, while there were only 2 chromosomes in ToxoDB-44\_*TgGT1* genome that contained  
428 one telomere (**Table S5**).

429 In addition to telomeres, the bulk of the remaining new sequence was due to multicopy loci.  
430 For example, two repetitive gene sequences are used for high sensitivity detection of *T. gondii*  
431 in tissue and environmental samples, the B1 gene (Burg *et al.* 1989) and the so-called “529 bp  
432 repeat” (Reischl *et al.* 2003; Edvinsson *et al.* 2006). The precise copy number for these genes  
433 has been impossible to determine using 1st and 2nd generation sequencing technologies and/or  
434 molecular biological experiments like Southern Blotting. Therefore, we used a curated blastn  
435 approach to quantify copy number for each of these sequences across our respective Nanopore  
436 assemblies. As shown in figure 5A, copy number for the B1 gene was dramatically higher in our  
437 Nanopore assemblies compared to existing ToxoDB assemblies (as expected). What was  
438 unexpected, however, was that copy number for this gene was lower than that predicted in the  
439 literature, ranging between 9 and 19 tandem copies depending on the strain (**Figure 5A**),  
440 compared to quantitative blotting-based estimates of 35 (Burg *et al.* 1989). Copy number at this

441 locus was stable, in that all of the queried IlxIII F1 progeny, copy number for each was identical  
442 to the parent from which it obtained that chromosomal segment. In contrast to the B1 locus, the  
443 “529 bp repeat” locus varied dramatically between isolates and these same F1 progeny. Copy  
444 number ranged from 85 to 205, and copy number at this locus for all F1 progeny varied  
445 independently of the underlying genotype for that region (white letters and green/blue in **Figure**  
446 **5B**). The size of this genome expansion is best illustrated by the whole chromosome alignment  
447 shown in **Figure 5C** comparing the *T. gondii* ME49 529 bp repeat locus in the version 43  
448 assembly on ToxoDB to our Nanopore assembly (**Figure 5C**). Importantly the 529 bp repeat  
449 locus occurs near a sequence assembly gap, and our long read assembly closed this gap (see  
450 below and **Figure 5D**), giving the most accurate estimate of 529 bp repeat copy number in any  
451 *T. gondii* strain which again varies compared to estimates in the literature (ranging from 200-300  
452 copies; e.g., (Reischl *et al.* 2003; Edvinsson *et al.* 2006)). Regardless, similar to tandem gene  
453 arrays discussed above in **Figure 3**, it appears that even noncoding repeats like the B1 gene  
454 and the 529 bp repeat can also differ in their capacity to change in number during sexual  
455 recombination or not. Moreover, unappreciated strain differences in copy number at these loci  
456 may adversely affect interpretation of PCR-based detection assays, especially those using more  
457 quantitative methods.

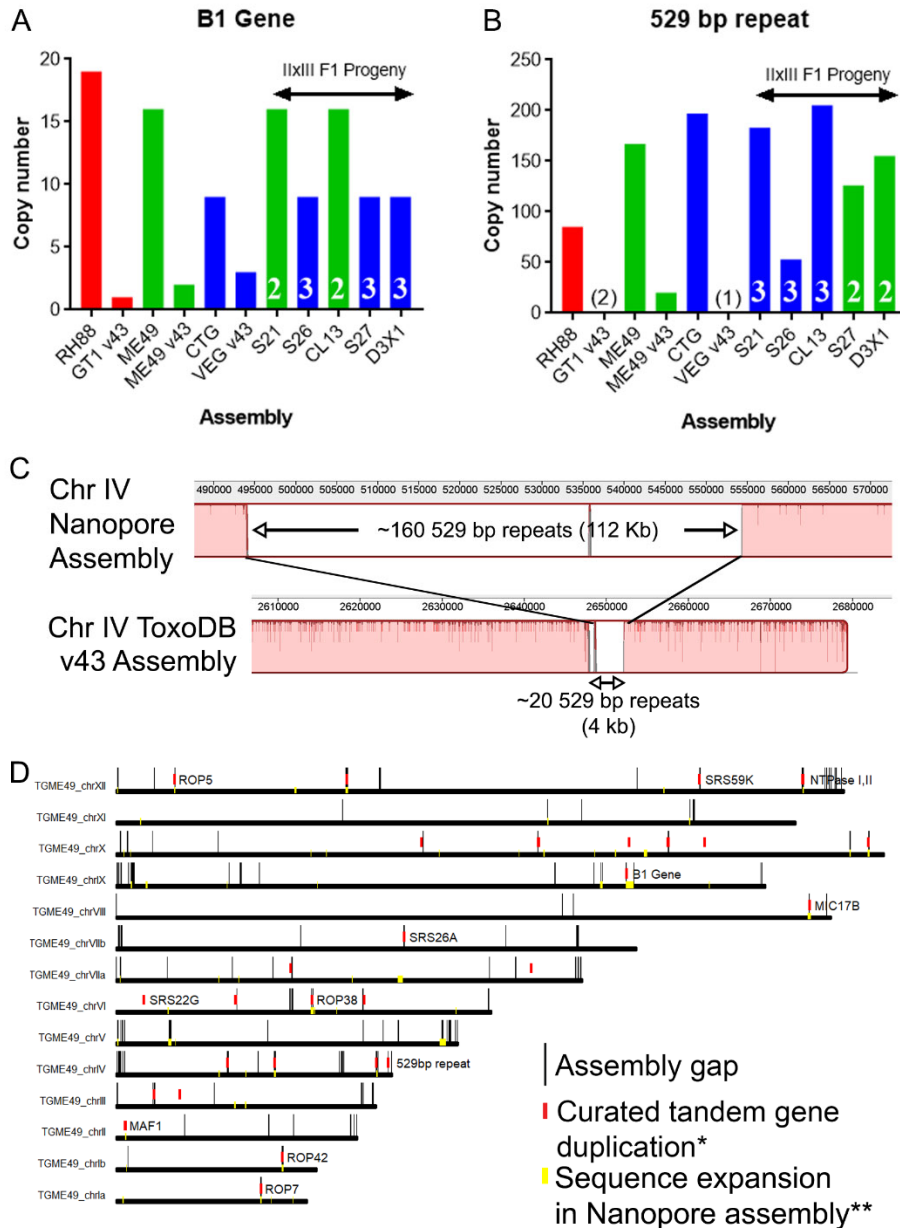

458

459 *Figure 5: Long read sequence assemblies precisely resolve canonical repeat*  
 460 *sequences and identify additional expansions at gene-harboring loci. (A,B)*  
 461 *Estimated copy number for Nanopore assemblies and existing genome*  
 462 *assemblies on ToxoDB (“v43”) for *T. gondii* strain types 1, 2 and 3 and IlxIII*  
 463 *F1 progeny. In all cases, Nanopore assemblies identified dramatically higher*  
 464 *numbers of either the B1 gene (A) or the 529 bp repeat (B). In the F1 progeny,*  
 465 *B1 gene copy number tracked directly with the genotype (type 2 or 3) at that*  
 466 *locus (A), while these same F1 progeny harbored unique numbers of 529 bp*  
 467 *copies, all of which were not only distinct from their respective genotypes of*  
 468 *origin but distinct from one another (B). (C) Whole chromosome alignment*

469 *focused on the 529 bp repeat region for the v43 ToxoDB assembly (bottom)*  
470 *and our Nanopore-based assembly (top). Expansion of the known genome*  
471 *sequence at this locus in the Nanopore sequence compared to the ToxoDB*  
472 *assembly is clear, and consistent with our identification of ~140 previously*  
473 *unknown 529 bp repeats in the ME49 genome. (D) Genome-wide assessment*  
474 *of expanded genome sequences mapped onto version 43 of the *T. gondii**  
475 *genome taken from ToxoDB. Black bars indicate sequence gaps, red bars*  
476 *indicate known tandem gene arrays, and yellow bars indicate regions that*  
477 *were expanded by at least 5000 bp in the long read Nanopore assembly.*

478

479 As described above all of our sequence assemblies increased the size of the contiguous  
480 assemblies by 1-3 Mb. While some of this new sequence is most certainly derived from gene-  
481 poor regions containing simple tandem repeats, the relatively high gene density of the *T. gondii*  
482 genome led us to hypothesize that some of this “new” sequence should be derived from gene  
483 sequences that were previously masked by assembly gaps. Therefore we used BLASTN and  
484 custom parsing scripts to identify genome expansions in our Nanopore assembly relative to the  
485 v43 sequence on ToxoDB specifically using all available predicted genes as query sequences.  
486 Overall, we identified 62 gene-containing loci that were at least 10 Kb larger in our Nanopore  
487 assembly compared to ToxoDB v43, representing 1.2 Mb of sequence. These expansions are  
488 represented in **Figure 5D** as yellow blocks, and are shown along with known tandem gene  
489 arrays (red blocks) and existing sequence gaps (black lines). Well known tandem gene arrays  
490 that are collapsed in 1st and 2nd generation sequence-based assemblies like MAF1 and ROP5  
491 were identified in this analysis (**Figure 5D**), confirming the accuracy of the approach. What was  
492 unexpected was the unequal distribution of these “expansions” in our genome-wide analysis  
493 (e.g., compare chromosomes XI and X). These expansions are due to increased copy number  
494 as well as previously unknown insertions of repetitive sequence.

495

#### 496 **Long-read assembly revises *N. caninum* karyotype its lack of synteny with *T. gondii***

497 The comparison of *TgRH88* long-read assembly and annotation with the ToxoDB-

498 44\_TgGT1 genome revealed a high level of collinearity between the two genomes with no large-  
499 scale rearrangement between chromosomes (except for the chrVIIb/VIII fusion) (**Figure 6A**),  
500 whereas a large number of chromosomal translocations and inversions were observed in the  
501 NcLiv long-read assembly with respect to ENA\_NcLiv genome (**Figure 6B**). For instance, the  
502 tig0000052 in NcLiv long-read assembly contained a portion of chrIX and a portion of chrX in  
503 the current *N. caninum* genome (**Figure 6B**). A portion of tig00000006 in NcLiv long-read  
504 assembly was mapped to the current *N. caninum* chrX, while the remainder of tig00000006 was  
505 mapped to chrIX and a region of it was inverted (**Figure 5B**). In addition to this, some  
506 chromosomal regions in the NcLiv long-read assembly did not show any synteny with the  
507 ENA\_NcLiv genome (**Figure 6B**). Similar chromosomal rearrangement patterns were observed  
508 in other *N. caninum* strains (as described in the co-submitted paper).

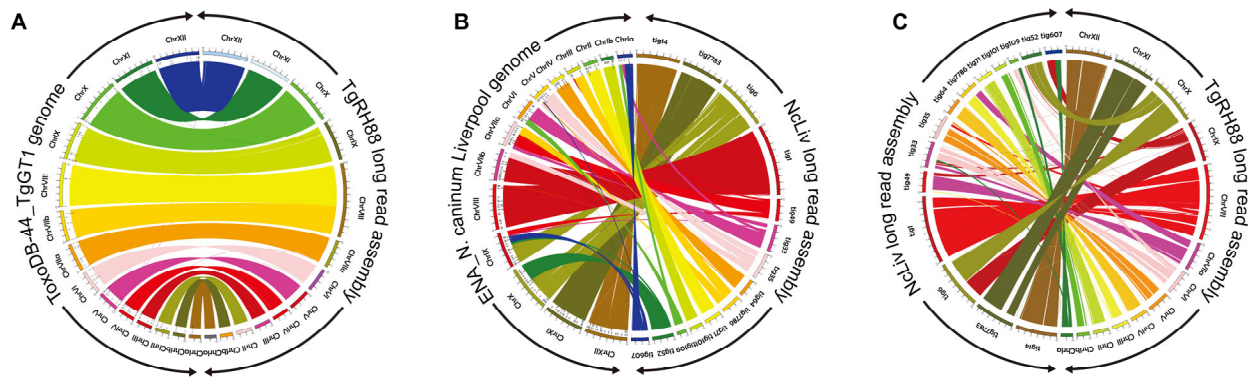

509

510 *Figure 6. Long-read assembly reveals N. caninum karyotype its synteny with*  
511 *T. gondii. (A) Circos plot showing high synteny between the TgRH88 long-*  
512 *read assembly and the ToxoDB-44\_TgGT1 genome. (B) Circos plot showing*  
513 *the chromosomal translocations and inversions in NcLiv long-read assembly*  
514 *compared to the ENA\_NcLiv genome. (C) Circos plot showing the syntenic*  
515 *relationship between TgRH88 and NcLiv long-read assembly.*

516

517 While previous studies (Reid *et al.* 2012; Lorenzi *et al.* 2016) showed that the current *T.*  
518 *gondii* and *N. caninum* reference genomes were highly syntenic, the comparison of TgRH88  
519 long-read assembly with the NcLiv long-read assembly showed smaller blocks of synteny in

520 most regions between the two genomes (**Figure 5C**). Many individual contigs of the *NcLiv* long-  
521 read assembly were shown to be mapped to multiple chromosome contigs in the *TgRH88* long-  
522 read assembly. For example, a 3.26-Mb region and a 4.43-Mb region of tig00000006 of the  
523 *NcLiv* long-read assembly were in synteny with regions on contig\_1 and contig\_3 of *TgRH88*  
524 long-read assembly, respectively (**Figure 6C**). Moreover, some regions of *NcLiv* long-read  
525 assembly (e.g. tig00007783: 2,000,000-2,500,000 bp) exhibit no synteny with the chromosomes  
526 of *TgRH88* genome (**Figure 6C**). Overall, our long-read assembly revealed a new and accurate  
527 *N. caninum* karyotype, and revised the genomic synteny between the two closely-related  
528 species, *T. gondii* and *N. caninum*.

529

## 530 **DISCUSSION**

531 The first wave of genome sequencing using first- and second-generation sequencing  
532 technologies revolutionized our ability to link phenotype to genotype in diverse strains of  
533 *Toxoplasma gondii* and its near relatives. Sequence from multiple isolates have been made  
534 publicly available and hosted on ToxoDB.org and were outlined in a recent publication (Lorenzi  
535 *et al.* 2016). These genomes, while of great use, were expectedly incomplete due to the  
536 presence of hundreds to thousands of sequence assembly gaps depending on sequencing  
537 depth and methodology. Recent years have experienced the impact of so-called “3rd  
538 generation” technologies that have revolutionized the speed, cost and efficacy of de novo  
539 sequence assembly, and most importantly provide a means to dramatically improve existing  
540 sequence assemblies. The critical feature of these approaches is the fact that they generate  
541 sequence read lengths hundreds to thousands of times longer than those generated using 1st  
542 and 2nd generation approaches, and can span repetitive sequence (both short tandem repeats  
543 and larger segmental duplications). This technology provides a unique opportunity to greatly  
544 improve the assembly of the *T. gondii* genome, particularly at repetitive loci which are known to  
545 encode diversified secreted effectors (Adomako-Ankomah *et al.* 2014; Adomako-Ankomah *et al.*



546 2016).

547 Our work revises the *T. gondii* and *N. caninum* karyotypes by identifying a previously  
548 unappreciated fusion between segments previously thought to be distinct chromosomes (VIIb  
549 and VIII). Early genetic mapping experiments and high molecular weight Southern blotting  
550 suggested that the *T. gondii* genome was made up of 14 chromosomes (Sibley and Boothroyd  
551 1992; Khan *et al.* 2005). Sequence assemblies provided support for this karyotype, in that  
552 genome segments containing genetic markers found on chromosomes VIIb and VIII always  
553 assembled into discrete units. Importantly, significant genetic linkage between markers on  
554 former chromosomes VIIb and VIII was observed (for example see the discussion in (Khan *et al.*  
555 2005) and figure S2 in (Khan *et al.* 2014)), but the lack of any contiguous assemblies for these  
556 two genome fragments (as found on ToxoDB.org as well as outlined in (Lorenzi *et al.* 2016)) led  
557 to continued acceptance of the 14 chromosome model. Recent reports using chromosome-  
558 capture technologies (“Hi-C”; (Bunnik *et al.* 2019)) also suggested a fusion between the VIIb  
559 and VIII genome fragments, and was the first study to propose a 13 chromosome karyotype.

560 Our work here conclusively establishes the *T. gondii* 13 chromosome karyotype in *T.*  
561 *gondii* strain ME49, and show that this karyotype is conserved across all queried *T. gondii*  
562 strains and one of its near relatives, *Neospora caninum*. The reason for the consistent  
563 prediction that fragments VIIb and VIII were distinct in *T. gondii* was clearly due to repetitive  
564 sequences near the breakpoint (hence the consistent and artificial fragmentation of this  
565 chromosome across multiple de novo sequenced strains; (Lorenzi *et al.* 2016)). For *N. caninum*,  
566 it appears that the 14 chromosome model was based on overestimation of the degree of  
567 synteny between *T. gondii* and *N. caninum* (Reid *et al.* 2012). This karyotype that is robustly  
568 supported by our assemblies are consistent with existing Hi-C data (Bunnik *et al.* 2019) and  
569 existing genetic linkage maps from F1 progeny derived from type IxII and IxIII crosses (Khan *et*  
570 *al.* 2005; Khan *et al.* 2014).

571 Tandem gene expansion followed by selection-driven diversification provides a means

572 for genome innovation and neofunctionalization, and this has occurred at multiple loci in the *T.*  
573 *gondii* genome (Adomako-Ankomah *et al.* 2014; Adomako-Ankomah *et al.* 2016; Blank and  
574 Boyle 2018). These loci can differ in copy number between strains, including those belonging to  
575 the same clonal lineage (for example MAF1 and ROP5 copy number differs between “Type 1”  
576 strains GT1 and RH (Adomako-Ankomah *et al.* 2014; Adomako-Ankomah *et al.* 2016), and  
577 MAF1 copy number differs between “Type 3” strains CTG and VEG (Adomako-Ankomah *et al.*  
578 2016). While it is generally assumed that copy number changes can occur during errors in DNA  
579 replication, this could occur with different frequency during sexual versus asexual propagation.  
580 Here we show that some loci can change in gene number and content during sexual  
581 recombination by sequencing multiple F1 progeny from a well-defined cross between type 2 and  
582 type 3 *T. gondii*. Specific changes in copy number and/or content at specific loci could have a  
583 dramatic impact on the overall virulence phenotypes of individual F1 progeny that emerge from  
584 natural crosses.

585 Taken together these data clearly demonstrate that the *T. gondii* karyotype has been  
586 mischaracterized as being made up of 14, rather than 13, chromosomes. The 13 chromosome  
587 karyotype is consistent across multiple strains and is also conserved across the local  
588 phylogeny, in that *N. caninum* has the same number. This is consistent with a propensity for  
589 chromosome number to be largely conserved between closely-related species even when gene  
590 content and overall synteny may differ dramatically (as they do for *N. caninum* and *T. gondii*, in  
591 contrast to previous work that overestimated the extent of synteny between these species; (Reid  
592 *et al.* 2012)). These data represent a new era in genome sequencing in *T. gondii* and its near  
593 relatives, allowing for near-complete telomere-to-telomere assemblies of *T. gondii* strains to be  
594 generated with minimal effort and cost.

595

## 596 **METHODS**

### 597 **Parasite and cell culture**

598 All *T. gondii* strains and *N. caninum* Liverpool strain were maintained by serial passage of  
599 tachyzoites in human foreskin fibroblasts (HFFs). HFFs were cultured in Dulbecco's modified  
600 Eagle's medium (DMEM) containing 10% fetal bovine serum (FBS), 2 mM glutamine, and 50  
601 mg/ml each of penicillin and streptomycin at 37 °C in a 5% CO<sub>2</sub> incubator.

#### 602 **High-molecular-weight (HMW) genomic DNA extraction**

603 Prior to DNA purification, tachyzoites of *T. gondii* or *N. caninum* Liverpool strain were grown  
604 in 2×10<sup>7</sup> HFFs for about 5-7 days until the monolayer was fully infected. The infected cells were  
605 then scraped, and syringe-lysed to release the parasites, and the parasites were harvested by  
606 filtering (5.0 µm syringe filter, Millipore) and centrifugation. The pelleted parasites were  
607 resuspended and lysed in 10 ml TLB buffer (100 mM NaCl, 10 mM Tris-HCl [pH 8.0], 25 mM  
608 EDTA [pH 8.0], 0.5% (w/v) SDS) containing 20 µg/ml RNase A for 1 hour at 37 °C, followed by a  
609 3-hour proteinase K (20 mg/ml) digestion at 50 °C. The lysate was split into two tubes containing  
610 phase-lock gel (Quantabio), and 5 ml TE-saturated phenol (Millipore Sigma) was added to each  
611 tube, mixed by rotation for 10 min and centrifuged for 10 min at 4,750×g. The DNA was isolated  
612 by removing the aqueous phase to two tubes containing phase-lock gel, followed by a 25:24:1  
613 phenol-chloroform-isoamyl alcohol (Millipore Sigma) extraction. The DNA in the aqueous phase  
614 was further purified by ethanol precipitation by adding 4 ml 3 M NaOAc (pH 5.2), and then  
615 mixing 30 ml ice-cold 100% ethanol. The solution was mixed by gentle inversion and briefly  
616 centrifuged at 1000×g for 2 min to pellet the DNA. The resulting pellet was washed three times  
617 with 70% ethanol, and all visible traces of ethanol were removed from the tube. The DNA was  
618 allowed to air dry for 5 min on a 40 °C heat block, resuspended in 40 µl elution buffer (10 mM  
619 Tris-HCl [pH 8.5]) without mixing on pipetting, followed by an overnight incubation at 4 °C. The  
620 concentration and purity of the eluted DNA were measured using a NanoDrop  
621 spectrophotometer (Thermo Scientific), and approximately 400 ng of DNA was used for  
622 sequencing library preparation.

623

## 624 **MinION library preparation and sequencing**

625 The MinION sequencing libraries were prepared using the SQK-RAD004 or SQK-RBK004  
626 kit (Oxford Nanopore Technologies) protocol accompanying all pipetting steps performed using  
627 pipette tips with ~1 cm cut off of the end. Seven point five  $\mu$ l of HMW genomic DNA  
628 (corresponding to 400ng of DNA) was mixed with 2.5  $\mu$ l of fragmentation mix (SQK-RAD004 kit)  
629 or barcoded fragmentation mix (SQK-RBK004 kit), and then incubated at 30 °C for 1 min,  
630 followed by 80 °C for 1 min on a thermocycler. After incubation, 1  $\mu$ l of rapid adapter mix was  
631 added and mixed gently by flicking the tube, and the library was allowed to be incubated at  
632 room temperature for 5 min. Prior to the library loading, the flow cell (MinION R9.4.1 flow cell  
633 [FLO-MIN106, Oxford Nanopore Technologies]) was primed by loading 800  $\mu$ l of priming mix  
634 (flush tether and flush buffer mix, Oxford Nanopore Technologies) into the priming port on the  
635 flow cell and left for 5 min. After priming, 11  $\mu$ l of DNA library was mixed with 34  $\mu$ l of  
636 sequencing buffer (Oxford Nanopore Technologies), 25.5  $\mu$ l of resuspended loading beads  
637 (Oxford Nanopore Technologies), and 4.5  $\mu$ l of nuclease-free water. To initiate sequencing, 75  
638  $\mu$ l of the prepared library was loaded onto the flow cell through the SpotON sample port in a  
639 drop-by-drop manner. Sequencing was performed immediately after platform QC, which  
640 determined the number of active pores. The sequencing process was controlled using  
641 MinKNOW (Oxford Nanopore Technologies) and the resulting FAST5 files were base-called  
642 using Guppy v3.2.1 (Oxford Nanopore Technologies). The barcoded sequencing reads were  
643 demultiplexed using Deepbinner (<https://github.com/rrwick/Deepbinner>). Read statistics were  
644 computed and graphed using Nanoplot v1.0.0 (De Coster *et al.* 2018).

## 645 **Read quality control and *de novo* genome assembly**

646 To assess read quality, raw sequencing reads were aligned against the reference genomes  
647 (Information of the reference genomes used in this study are shown in **Table S1**) using  
648 Minimap2 (Li 2018) with the following parameter: -ax map-ont. All reads > 1000 bp in length  
649 were input into Canu v1.7.1 (Koren *et al.* 2017) for *de novo* assembly using the complete Canu

650 pipeline (correction, trimming, and assembly) (Koren *et al.* 2017) with the following parameters:  
651 correctedErrorRate=0.154, gnuplotTested=TRUE, minReadLength=1000, and `-nanopore-raw`.  
652 Assembly was performed based on an estimated 65 Mb genome size for *T. gondii* strains, and  
653 57 Mb for *N. caninum* Liverpool strain, and was run using the Slurm management system on the  
654 high throughput computing (HTC) cluster at University of Pittsburgh.

### 655 **Error correction and assembly polishing**

656 For the Canu-yielded *TgRH88*, *TgME49*, *TgCTG*, and *NcLiv* assemblies, assembly errors  
657 were corrected by Pilon v1.23 (Walker *et al.* 2014) with four iterations using the alignment of  
658 select whole-genome Illumina paired-end reads (SRA: SRR5123638, SRR2068653,  
659 SRR5643140, or ERR701181) to the assembly contigs generated by BWA-MEM (Li 2013). The  
660 resulting corrected contigs were reassembled using Flye v2.5 (Kolmogorov *et al.* 2019). For the  
661 II×III F1 progeny assemblies, CL13, S27, S21, S26, and D3X1, the assembly contigs were  
662 directly subjected to Flye for reassembly without Pilon correction. The final contigs/scaffolds in  
663 the *TgRH88*, *TgME49*, and *TgCTG* assemblies were assigned, ordered, and oriented to  
664 chromosomes using ToxoDB-44 genomes as reference (**Table S1**).

### 665 **Long-read assembly evaluation**

666 Assembly statistics were computed using Canu v1.7.1 and QUAST v5.0.2 (Mikheenko *et al.*  
667 2018). Genome assembly completeness assessment was performed using BUSCO v3.0.2  
668 (Waterhouse *et al.*) against the Protists\_ensembl dataset. Gene predictions were performed  
669 using Augustus v3.3 (Keller *et al.* 2011) with the *Toxoplasma gondii*-specific training set.

### 670 **Whole genome alignment**

671 Whole genome alignments between the long-read assemblies and the reference genomes  
672 were performed using MUMmer v4.0.0 (Kurtz *et al.* 2004) and Mauve v2.4.0 (Darling *et al.*  
673 2004). Dotplots were generated using D-Genies (Cabanettes and Klopp 2018). BWA-MEM was  
674 used for remapping the corrected reads to the reference genomes, and all SAM files were  
675 parsed to sorted BAM files using SAMtools v1.9 (Li *et al.* 2009). Alignments were visualized

676 using IGV v2.4.15 (Thorvaldsdottir *et al.* 2013).

### 677 **Structural variant detection**

678 Structural variants between the long-read assemblies and the reference genomes were  
679 identified by processing the delta file generated by the MUMmer alignment generator NUCmer  
680 with the parameter “show-diff”. In addition, manual curation of structural variants was performed  
681 by visual inspection of chromosomal rearrangements based on the whole genome alignments  
682 generated using Mauve and using BLASTN to identify and count repetitive loci.

### 683 **Copy number variant detection**

684 For select the *T. gondii* or *N. caninum* tandemly expanded loci (*ROP5*, *ROP38*, *MIC17*,  
685 *MAF1*, *ROP4/7*, and *TSEL8*), all predicted gene sequences were extracted from ToxoDB, and  
686 then aligned to the long-read assemblies using BLASTN (Madden *et al.* 1996). Only alignments  
687 that showed more than 95% identity and 98% coverage were considered as a match. The type  
688 of paralogs was determined by alignment identity, and the number of copies at these loci was  
689 estimated by alignment match counts. Only matches that were within a single assembled  
690 Nanopore-derived contig were considered for copy number estimates, and the length of the  
691 sequence between the upstream of the first match or the downstream of the last match on the  
692 genomic coordinate and the edge of the corresponding contig had to be longer than that of the  
693 sequence between two adjacent matches.

### 694 **Identification and analysis of new sequences in the long-read assemblies**

695 To identify new sequences that filled reference assembly gaps, we aligned the long-read  
696 chromosome contigs to the reference assembly chromosomes using NUCmer with the “show-  
697 diff -q” parameter. The coordinates of a) sequence expansions and b) unaligned sequences  
698 from our *de novo* assembly were determined, and the corresponding sequences were extracted  
699 using custom scripts. Repeats in these sequences were detected using Tandem Repeat Finder  
700 (TRF) v4.09 (Benson 1999). Simple repeats and low-complexity repeats were predicted using  
701 RepeatMasker v4.0.9 (Smit *et al.* 2013-2015) with the RMblast search program against the

702 apicomplexans database. Gene content of the new sequences in long-read assemblies was  
703 assessed using BLASTX against the NCBI non-redundant protein sequences (nr) database and  
704 *Toxoplasma gondii* (taxid:5811) was chosen as the organism.

#### 705 **Hi-C Data analysis**

706 Published Hi-C reads (Bunnik *et al.* 2019) were realigned to assemblies TgRH88,  
707 TgME49, TgCTG, S27, and S21, then processed further by assigning fragments and removing  
708 invalid and duplicate pairs using the processing pipeline HiCPro (Servant *et al.* 2015). Resulting  
709 raw intrachromosomal and interchromosomal contact maps were built at 10-kb resolution and  
710 corrected for experimental and technical biases using ICE normalization (Imakaev *et al.* 2012).

#### 711 **DATA ACCESS**

712 All raw sequencing data and polished assemblies have been deposited at Genbank under  
713 accession numbers XXXX-XXXX (Genbank submission pending).

#### 714 **ACKNOWLEDGEMENTS**

715 The authors would like to thank members of the Boyle lab for critical reading of the  
716 manuscript and Josh Quick for public sharing of protocols for DNA isolation that maximize read  
717 length. This work was supported by grants R01AI116855 and R01AI114655 to J.P.B., State 554  
718 Scholarship Fund from the China Scholar Council (201708440340) to JX, grant R21 AI142506  
719 (NIH) and NIFA-Hatch-225935 (University of California, Riverside) to KGLR.

720

#### 721 **DISCLOSURE DECLARATION**

722 The authors have no conflicts of interest.

723

724 **REFERENCES:**

- 725 Adomako-Ankomah Y, English ED, Danielson JJ, Pernas LF, Parker ML, Boulanger MJ, Dubey  
726 JP, Boyle JP. 2016. Host Mitochondrial Association Evolved in the Human Parasite  
727 *Toxoplasma gondii* via Neofunctionalization of a Gene Duplicate. *Genetics* **203**(1): 283-  
728 298.
- 729 Adomako-Ankomah Y, Wier GM, Borges AL, Wand HE, Boyle JP. 2014. Differential locus  
730 expansion distinguishes Toxoplasmatinae species and closely related strains of  
731 *Toxoplasma gondii*. *mBio* **5**(1): e01003-01013.
- 732 Benson G. 1999. Tandem repeats finder: a program to analyze DNA sequences. *Nucleic acids*  
733 *research* **27**(2): 573-580.
- 734 Blank ML, Boyle JP. 2018. Effector variation at tandem gene arrays in tissue-dwelling coccidia:  
735 who needs antigenic variation anyway? *Current opinion in microbiology* **46**: 86-92.
- 736 Brooks CF, Francia ME, Gissot M, Croken MM, Kim K, Striepen B. 2011. *Toxoplasma gondii*  
737 sequesters centromeres to a specific nuclear region throughout the cell cycle.  
738 *Proceedings of the National Academy of Sciences of the United States of America*  
739 **108**(9): 3767-3772.
- 740 Bunnik EM, Venkat A, Shao J, McGovern KE, Batugedara G, Worth D, Prudhomme J, Lapp SA,  
741 Andolina C, Ross LS et al. 2019. Comparative 3D genome organization in apicomplexan  
742 parasites. *Proceedings of the National Academy of Sciences of the United States of*  
743 *America*.
- 744 Burg JL, Grover CM, Pouletty P, Boothroyd JC. 1989. Direct and sensitive detection of a  
745 pathogenic protozoan, *Toxoplasma gondii*, by polymerase chain reaction. *Journal of*  
746 *clinical microbiology* **27**(8): 1787-1792.
- 747 Cabanettes F, Klopp C. 2018. D-GENIES: dot plot large genomes in an interactive, efficient and  
748 simple way. *PeerJ* **6**: e4958.
- 749 Darling AC, Mau B, Blattner FR, Perna NT. 2004. Mauve: multiple alignment of conserved



- 750 genomic sequence with rearrangements. *Genome Res* **14**(7): 1394-1403.
- 751 De Coster W, D'Hert S, Schultz DT, Cruts M, Van Broeckhoven C. 2018. NanoPack: visualizing  
752 and processing long-read sequencing data. *Bioinformatics (Oxford, England)* **34**(15):  
753 2666-2669.
- 754 Diaz-Viraque F, Pita S, Greif G, Moreira de Souza RdC, Iraola G, Robello C. 2018. Nanopore  
755 sequencing significantly improves genome assembly of the eukaryotic protozoan  
756 parasite *Trypanosoma cruzi*. *bioRxiv*: 489534.
- 757 Dudchenko O, Batra SS, Omer AD, Nyquist SK, Hoeger M, Durand NC, Shamim MS, Machol I,  
758 Lander ES, Aiden AP et al. 2017. De novo assembly of the *Aedes aegypti* genome using  
759 Hi-C yields chromosome-length scaffolds. *Science* **356**(6333): 92-95.
- 760 Edvinsson B, Lappalainen M, Evengard B, Toxoplasmosis ESGf. 2006. Real-time PCR targeting  
761 a 529-bp repeat element for diagnosis of toxoplasmosis. *Clinical microbiology and*  
762 *infection : the official publication of the European Society of Clinical Microbiology and*  
763 *Infectious Diseases* **12**(2): 131-136.
- 764 Ewing B, Green P. 1998. Base-calling of automated sequencer traces using phred. II. Error  
765 probabilities. *Genome Res* **8**(3): 186-194.
- 766 Ewing B, Hillier L, Wendl MC, Green P. 1998. Base-calling of automated sequencer traces  
767 using phred. I. Accuracy assessment. *Genome Res* **8**(3): 175-185.
- 768 Fournier T, Gounot JS, Freel K, Cruaud C, Lemainque A, Aury JM, Wincker P, Schacherer J,  
769 Friedrich A. 2017. High-Quality de Novo Genome Assembly of the *Dekkera bruxellensis*  
770 Yeast Using Nanopore MinION Sequencing. *G3 (Bethesda, Md)* **7**(10): 3243-3250.
- 771 Gajria B, Bahl A, Brestelli J, Dommer J, Fischer S, Gao X, Heiges M, Iodice J, Kissinger JC,  
772 Mackey AJ et al. 2008. ToxoDB: an integrated *Toxoplasma gondii* database resource.  
773 *Nucleic acids research* **36**(Database issue): D553-556.
- 774 Gissot M, Walker R, Delhaye S, Huot L, Hot D, Tomavo S. 2012. *Toxoplasma gondii*  
775 chromodomain protein 1 binds to heterochromatin and colocalises with centromeres and

- 776 telomeres at the nuclear periphery. *PloS one* **7**(3): e32671.
- 777 Imakaev M, Fudenberg G, McCord RP, Naumova N, Goloborodko A, Lajoie BR, Dekker J, Mirny  
778 LA. 2012. Iterative correction of Hi-C data reveals hallmarks of chromosome  
779 organization. *Nature methods* **9**(10): 999-1003.
- 780 Jain M, Koren S, Miga KH, Quick J, Rand AC, Sasani TA, Tyson JR, Beggs AD, Dilthey AT,  
781 Fiddes IT et al. 2018. Nanopore sequencing and assembly of a human genome with  
782 ultra-long reads. *Nature biotechnology* **36**(4): 338-345.
- 783 Jones JL, Holland GN. 2010. Annual burden of ocular toxoplasmosis in the US. *The American*  
784 *journal of tropical medicine and hygiene* **82**(3): 464-465.
- 785 Joynson DH, Wreghitt TG. 2005. *Toxoplasmosis: a comprehensive clinical guide*. Cambridge  
786 University Press.
- 787 Keller O, Kollmar M, Stanke M, Waack S. 2011. A novel hybrid gene prediction method  
788 employing protein multiple sequence alignments. *Bioinformatics (Oxford, England)* **27**(6):  
789 757-763.
- 790 Khan A, Behnke MS, Dunay IR, White MW, Sibley LD. 2009. Phenotypic and gene expression  
791 changes among clonal type I strains of *Toxoplasma gondii*. *Eukaryotic cell* **8**(12): 1828-  
792 1836.
- 793 Khan A, Shaik JS, Behnke M, Wang Q, Dubey JP, Lorenzi HA, Ajioka JW, Rosenthal BM,  
794 Sibley LD. 2014. NextGen sequencing reveals short double crossovers contribute  
795 disproportionately to genetic diversity in *Toxoplasma gondii*. *BMC Genomics* **15**(1):  
796 1168.
- 797 Khan A, Taylor S, Su C, Mackey AJ, Boyle J, Cole R, Glover D, Tang K, Paulsen IT, Berriman  
798 M et al. 2005. Composite genome map and recombination parameters derived from  
799 three archetypal lineages of *Toxoplasma gondii*. *Nucleic acids research* **33**(9): 2980-  
800 2992.
- 801 Kim K, Weiss LM. 2004. *Toxoplasma gondii*: the model apicomplexan. *International journal for*

- 802           *parasitology* **34**(3): 423-432.
- 803   Kolmogorov M, Yuan J, Lin Y, Pevzner PA. 2019. Assembly of long, error-prone reads using  
804           repeat graphs. *Nature biotechnology* **37**(5): 540-546.
- 805   Koren S, Walenz BP, Berlin K, Miller JR, Bergman NH, Phillippy AM. 2017. Canu: scalable and  
806           accurate long-read assembly via adaptive k-mer weighting and repeat separation.  
807           *Genome Res* **27**(5): 722-736.
- 808   Kurtz S, Phillippy A, Delcher AL, Smoot M, Shumway M, Antonescu C, Salzberg SL. 2004.  
809           Versatile and open software for comparing large genomes. *Genome biology* **5**(2): R12.
- 810   Lapp SA, Geraldo JA, Chien JT, Ay F, Pakala SB, Batugedara G, Humphrey J, Ma Hc, De BJ,  
811           Le Roch KG et al. 2018. PacBio assembly of a Plasmodium knowlesi genome sequence  
812           with Hi-C correction and manual annotation of the SICAvAr gene family. *Parasitology*  
813           **145**(1): 71-84.
- 814   Li H. 2013. Aligning sequence reads, clone sequences and assembly contigs with BWA-MEM.  
815           *arXiv:13033997v2 [q-bioGN]*.
- 816   -. 2018. Minimap2: pairwise alignment for nucleotide sequences. *Bioinformatics (Oxford,*  
817           *England)* **34**(18): 3094-3100.
- 818   Li H, Handsaker B, Wysoker A, Fennell T, Ruan J, Homer N, Marth G, Abecasis G, Durbin R.  
819           2009. The Sequence Alignment/Map format and SAMtools. *Bioinformatics (Oxford,*  
820           *England)* **25**(16): 2078-2079.
- 821   Lorenzi H, Khan A, Behnke MS, Namasivayam S, Swapna LS, Hadjithomas M, Karamycheva S,  
822           Pinney D, Brunk BP, Ajioka JW et al. 2016. Local admixture of amplified and diversified  
823           secreted pathogenesis determinants shapes mosaic *Toxoplasma gondii* genomes.  
824           *Nature Communications* **7**(1): 10147.
- 825   Madden TL, Tatusov RL, Zhang J. 1996. Applications of network BLAST server. *Methods in*  
826           *enzymology* **266**: 131-141.
- 827   Madoui MA, Engelen S, Cruaud C, Belser C, Bertrand L, Alberti A, Lemainque A, Wincker P,

- 828 Aury JM. 2015. Genome assembly using Nanopore-guided long and error-free DNA  
829 reads. *BMC Genomics* **16**: 327.
- 830 Matrajt M, Angel SO, Pszenny V, Guarnera E, Roos DS, Garberi JC. 1999. Arrays of repetitive  
831 DNA elements in the largest chromosomes of *Toxoplasma gondii*. *Genome* **42**(2): 265-  
832 269.
- 833 Michael TP, Jupe F, Bemm F, Motley ST, Sandoval JP, Lanz C, Loudet O, Weigel D, Ecker JR.  
834 2018. High contiguity *Arabidopsis thaliana* genome assembly with a single nanopore  
835 flow cell. *Nat Commun* **9**(1): 541.
- 836 Mikheenko A, Prjibelski A, Saveliev V, Antipov D, Gurevich A. 2018. Versatile genome  
837 assembly evaluation with QUAST-LG. *Bioinformatics (Oxford, England)* **34**(13): i142-  
838 i150.
- 839 Pfefferkorn ER, Pfefferkorn LC. 1976. *Toxoplasma gondii*: isolation and preliminary  
840 characterization of temperature-sensitive mutants. *Experimental parasitology* **39**(3): 365-  
841 376.
- 842 Quick J. 2018. Ultra-long read sequencing protocol for RAD004 V.3.  
843 [https://www.protocols.io/view/ultra-long-read-sequencing-protocol-for-rad004-](https://www.protocols.io/view/ultra-long-read-sequencing-protocol-for-rad004-mrxc57n?version_warning=no)  
844 [mrxc57n?version\\_warning=no](https://www.protocols.io/view/ultra-long-read-sequencing-protocol-for-rad004-mrxc57n?version_warning=no).
- 845 Reid AJ, Vermont SJ, Cotton JA, Harris D, Hill-Cawthorne GA, Könen-Waisman S, Latham SM,  
846 Mourier T, Norton R, Quail MA et al. 2012. Comparative Genomics of the Apicomplexan  
847 Parasites *Toxoplasma gondii* and *Neospora caninum*: Coccidia Differing in Host Range  
848 and Transmission Strategy. *PLOS Pathogens* **8**(3): e1002567.
- 849 Reischl U, Bretagne S, Kruger D, Ernault P, Costa JM. 2003. Comparison of two DNA targets  
850 for the diagnosis of Toxoplasmosis by real-time PCR using fluorescence resonance  
851 energy transfer hybridization probes. *BMC infectious diseases* **3**: 7.
- 852 Sanger F, Nicklen S, Coulson AR. 1977. DNA sequencing with chain-terminating inhibitors.  
853 *Proceedings of the National Academy of Sciences of the United States of America*

854           **74**(12): 5463-5467.

855 Schmidt MH, Vogel A, Denton AK, Istace B, Wormit A, van de Geest H, Bolger ME, Alseekh S,  
856 Mass J, Pfaff C et al. 2017. De Novo Assembly of a New *Solanum pennellii* Accession  
857 Using Nanopore Sequencing. *The Plant cell* **29**(10): 2336-2348.

858 Servant N, Varoquaux N, Lajoie BR, Viara E, Chen CJ, Vert JP, Heard E, Dekker J, Barillot E.  
859 2015. HiC-Pro: an optimized and flexible pipeline for Hi-C data processing. *Genome*  
860 *biology* **16**: 259.

861 Sibley LD, Ajioka JW. 2008. Population structure of *Toxoplasma gondii*: clonal expansion driven  
862 by infrequent recombination and selective sweeps. *Annual review of microbiology* **62**:  
863 329-351.

864 Sibley LD, Boothroyd JC. 1992. Construction of a molecular karyotype for *Toxoplasma gondii*.  
865 *Molecular and biochemical parasitology* **51**(2): 291-300.

866 Smit A, Hubley R, Green P. 2013-2015. RepeatMasker Open-4.0.

867 Thorvaldsdottir H, Robinson JT, Mesirov JP. 2013. Integrative Genomics Viewer (IGV): high-  
868 performance genomics data visualization and exploration. *Briefings in bioinformatics*  
869 **14**(2): 178-192.

870 Villard O, Candolfi E, Ferguson DJ, Marcellin L, Kien T. 1997. Loss of oral infectivity of tissue  
871 cysts of *Toxoplasma gondii* RH strain to outbred Swiss Webster mice. *International*  
872 *journal for parasitology* **27**(12): 1555-1559.

873 Vollger MR, Logsdon GA, Audano PA, Sulovari A, Porubsky D, Peluso P, Wenger AM,  
874 Concepcion GT, Kronenberg ZN, Munson KM et al. 2019. Improved assembly and  
875 variant detection of a haploid human genome using single-molecule, high-fidelity long  
876 reads. *Annals of human genetics*.

877 Walker BJ, Abeel T, Shea T, Priest M, Abouelliel A, Sakthikumar S, Cuomo CA, Zeng Q,  
878 Wortman J, Young SK et al. 2014. Pilon: An Integrated Tool for Comprehensive  
879 Microbial Variant Detection and Genome Assembly Improvement. *PloS one* **9**(11):

880 e112963.

881 Waterhouse RM, Seppey M, Simao FA, Manni M, Ioannidis P, Klioutchnikov G, Kriventseva EV,

882 Zdobnov EM. BUSCO Applications from Quality Assessments to Gene Prediction and

883 Phylogenomics. (1537-1719 (Electronic)).

884
